# Supplementary material for: Colonic Oxidative and Mitochondrial Function in Parkinson’s Disease and Idiopathic REM Sleep Behavior Disorder
Source: Hindawi journal article supplement (doi:10.1155/2017/9816095), 2017-01-01
Supplement: f1 [file 9816095.f1.pdf]

**S1**

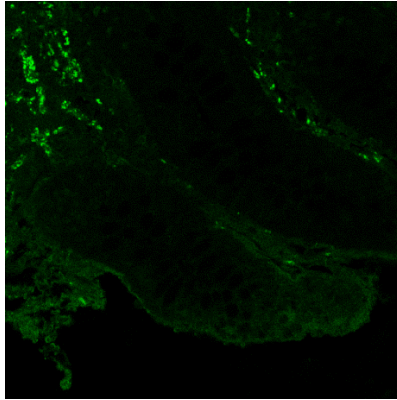

**Supplementary Figure 1 S1. Micrography from colonic sample.** Immunohistochemistry from a colonic sample using PGP.9.5 antibody against axonal neurons using confocal microscope.
